# Supplementary material
Source: PubMed Central journal article supplement (PMC4282412)
Supplement: pro0024-0058-sd1.pdf [file pro0024-0058-sd1.pdf]

## **Supplementary Material**

### **Quaternary structure of WzzB and WzzE Polysaccharide Co- Polymerases**

Sergei Kalynych<sup>1</sup>, Maia Cherney<sup>2</sup>, Mihnea Bostina<sup>4</sup>, Isabelle Rouiller<sup>3</sup> and  
Miroslaw Cygler<sup>1,2,\*</sup>

Figure S1. Size-exclusion chromatography of WzzB and WzzE proteins in select detergents including decyl-maltoside (DM), octyl-glucoside (OG), and dodecyl-Dimethylamine-N-oxide (LDAO).

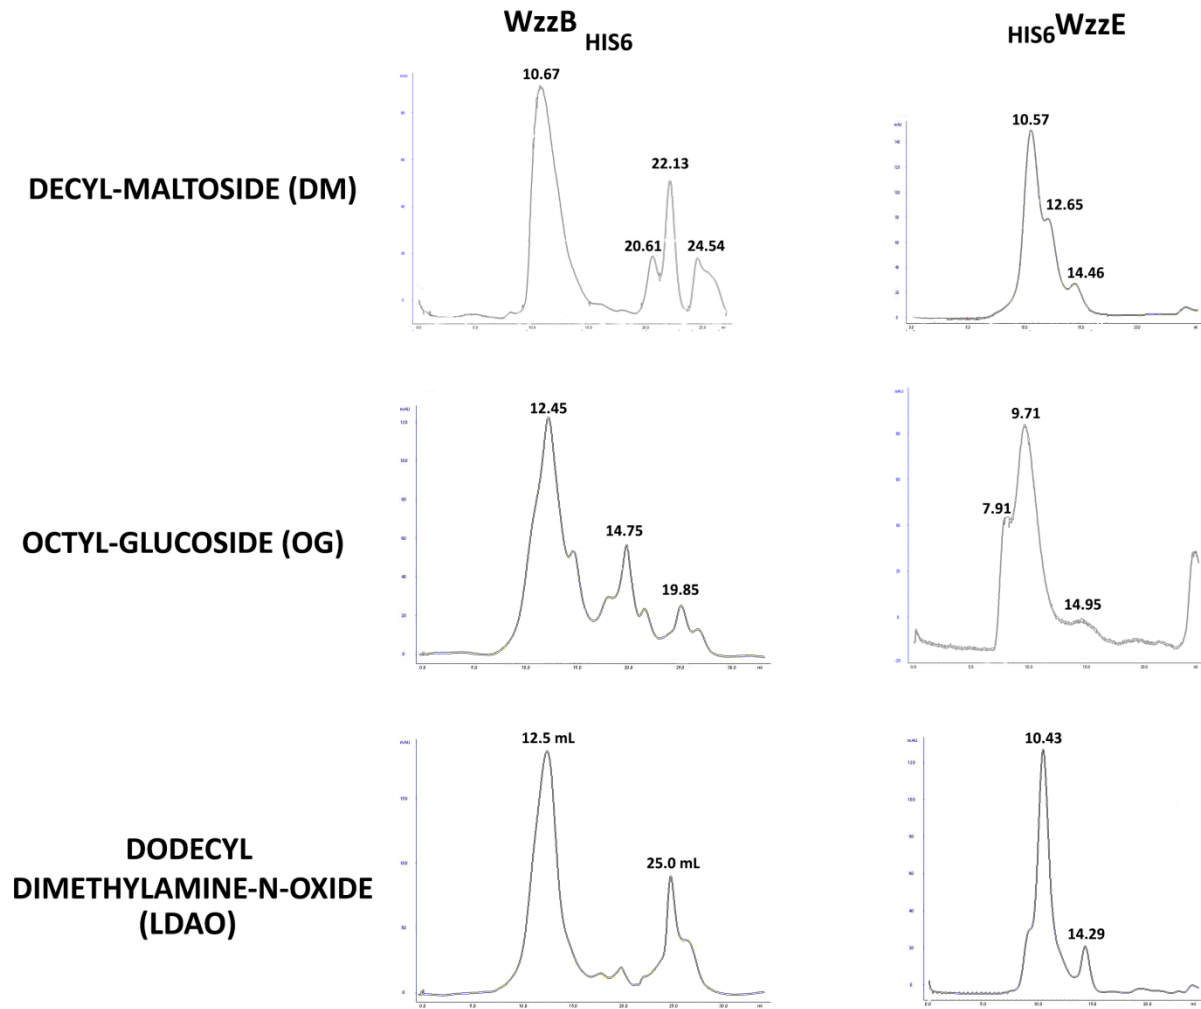

Table S1. A summary of the detergents used for WzzE purification and crystallization.

| Detergent                                           | Abbrev.      | Conc<br>(%/mM) | Chemical Structure                                                                   | Outcome                      |
|-----------------------------------------------------|--------------|----------------|--------------------------------------------------------------------------------------|------------------------------|
| dodecyl- $\beta$ -maltopyranoside                   | DDM          | 0.02/0.4       | 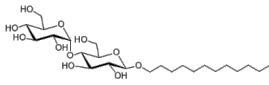   | Crystals<br>(20A)            |
| undecyl- $\beta$ -maltopyranoside                   | UDM          | 0.15/1.0       |    | Crystals<br>(no diffraction) |
| decyl- $\beta$ -maltopyranoside                     | DM           | 0.18/3         |    | Crystals<br>(28A)            |
| nonyl- $\beta$ -glucoside                           | NG           | 0.4/12         |    | Protein<br>Precipitation     |
| octyl- $\beta$ -glucoside                           | OG           | 0.8/36         |    | No Crystals                  |
| polyoxyethylene(8)dodecyl ether                     | C12E8        | 0.072/0.5      |    | Crystals<br>(10A)            |
| polyoxyethylene(6)decyl Ether                       | C10E6        | 0.076/1.8      |  | Poor SEC<br>Profile          |
| tetraethylene Glycol Monooctyl Ether                | C8E4         | 0.5/18         |  | Crystals                     |
| decanoyl-N-Methylglucamide                          | MEGA-10      | 0.4/14         |  | No Crystals                  |
| decanoyl-N-hydroxyethylglucamide                    | HEGA-10      | 0.5/14         |  | Protein<br>Precipitation     |
| n-Dodecylphosphocholine                             | FOS-12       | 0.1/3          |  | No Crystals                  |
| n-Undecylphosphocholine                             | FOS-11       | 0.15/4         |  | No Crystals                  |
| n-Dodecyl-N,N-Dimethylamine-N-Oxide                 | LDAO         | 0.05/4         |  | Crystals<br>6.3A             |
| n-Dodecyl-N,N-Dimethyl-3-Ammonio-1-Propanesulfonate | Anzergent-12 | 0.2/6          |  | Crystals<br>(12A)            |

|                                                                                                    |              |          |                                                                                     |                       |
|----------------------------------------------------------------------------------------------------|--------------|----------|-------------------------------------------------------------------------------------|-----------------------|
| n-Tetradecyl-N,N-Dimethyl-3-Ammonio-1-Propanesulfonate                                             | Anzergent-14 | 0.01/0.4 | 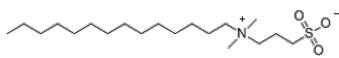  | Crystals (12A)        |
| lauryl maltose neopentyl glycol                                                                    | LMNG         | 0.250 mM |   | Poor SEC Profile      |
| decyl maltose neopentyl glycol                                                                     | DMNG         | 0.250 mM |   | Poor SEC Profile      |
| octyl glucose neopentyl glycol                                                                     | OGNG         | 2 mM     |   | Poor SEC Profile      |
| 3-[(3-cholamidopropyl)dimethylammonio]-1-propanesulfonate                                          | CHAPS        | 10 mM    |   | Poor SEC Profile      |
| 3 $\alpha$ -hydroxy-7 $\alpha$ ,12 $\alpha$ -di-((O- $\beta$ -D-maltosyl)-2-hydroxyethoxy)-cholane | FA-3         | 0.2 mM   |  | Protein Precipitation |
